# Supplementary figures and images for: Genetic Diversity Analysis based on the Virulence, Physiology and Regional Variability in Different Isolates of Powdery Mildew in Pea
Source: MDPI journal article supplement (doi:10.3390/jof8080798), 2022-07-29

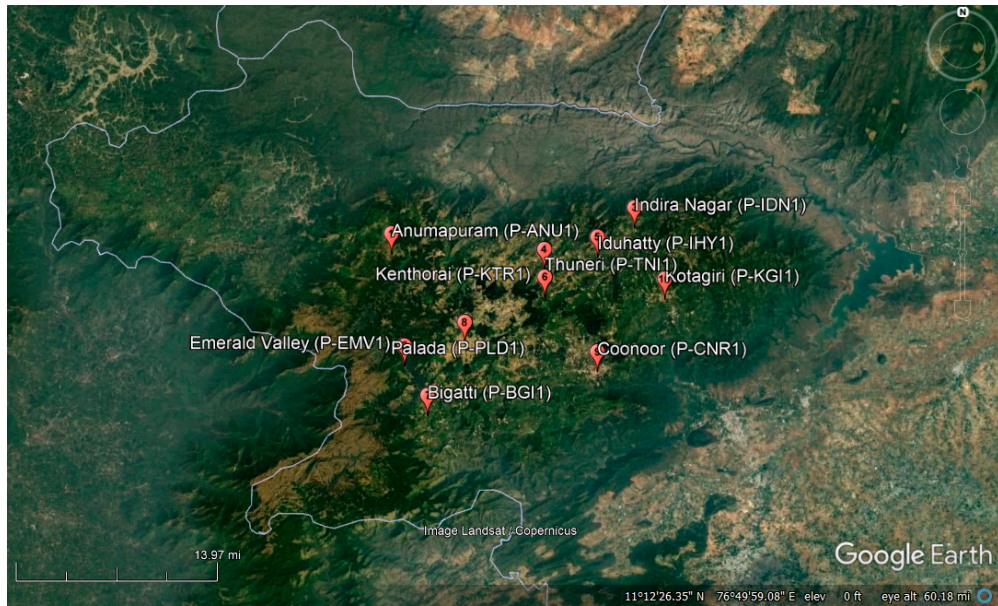

**Figure S1.** Collection sites (pinned in Google Earth Pro for non-commercial purpose).

Supplement: s1 [file s1]
